# Supplementary material
Source: ML conference proceedings conference paper supplement (https://aclanthology.org/K19-1029)
Supplement: Attachment [file poly_conll_appendix.pdf › poly_conll_appendix.pdf]

| Character CNNs                       |                                                                    |
|--------------------------------------|--------------------------------------------------------------------|
| Char embedding size                  | 16                                                                 |
| (# Window Size, # Filters)           | (1, 32), (2, 32), (3, 68), (4, 128), (5, 256), (6, 512), (7, 1024) |
| Activation                           | Relu                                                               |
| Word-level LSTM                      |                                                                    |
| LSTM size                            | 2048                                                               |
| # LSTM layers                        | 2                                                                  |
| LSTM projection size                 | 256                                                                |
| Use skip connections                 | Yes                                                                |
| Inter-layer dropout rate             | 0.1                                                                |
| Training                             |                                                                    |
| Batch size                           | 128                                                                |
| Unroll steps (Window Size)           | 20                                                                 |
| # Negative samples                   | 64                                                                 |
| # Epochs                             | 10                                                                 |
| Adagrad (Duchi et al., 2011) lr rate | 0.2                                                                |
| Adagrad initial accumulator value    | 1.0                                                                |

Table 7: Language model hyperparameters.

| Input                              |       |
|------------------------------------|-------|
| Input dropout rate                 | 0.3   |
| Word-level BiLSTM                  |       |
| LSTM size                          | 400   |
| # LSTM layers                      | 3     |
| Recurrent dropout rate             | 0.3   |
| Inter-layer dropout rate           | 0.3   |
| Use Highway Connection             | Yes   |
| Multilayer Perceptron, Attention   |       |
| Arc MLP size                       | 500   |
| Label MLP size                     | 100   |
| # MLP layers                       | 1     |
| Activation                         | Relu  |
| Training                           |       |
| Batch size                         | 80    |
| # Epochs                           | 80    |
| Early stopping                     | 50    |
| Adam (Kingma and Ba, 2015) lr rate | 0.001 |
| Adam $\beta_1$                     | 0.9   |
| Adam $\beta_2$                     | 0.999 |

Table 8: UD parsing hyperparameters.

## A Training Parameters

In this section, we provide hyperparameters used in our models and training details for ease of replication.

### A.1 Language Models

Seen in Table 7 is a list of hyperparameters for our language models. We use the publicly available code of Peters et al. (2018) for training.<sup>14</sup> Following Mulcaire et al. (2019), we reduce the LSTM and projection sizes to expedite training and to compensate for the greatly reduced training data—the hyperparameters used in Peters et al. (2018) were tuned for the One Billion Word Corpus (Chelba et al., 2013), while we used only 5% as much text (approximately 50M tokens) per language. Contextual representations from language models trained with even less text are still effective (Che et al., 2018; Schuster et al., 2019), suggesting that the method used in this work would apply to even lower-resource languages that have scarce text in addition to scarce or nonexistent annotation, though at the cost of some of the performance.

### A.2 UD Parsing

For UD parsing, we generally follow the hyperparameters used for the dependency parsing demo in AllenNLP (Gardner et al., 2018). See a list of hyperparameters in Table 8. We use stratified sampling so that each training mini-batch has an equal

number of sentences from the source and target languages.

### A.3 Multilingual Word Vectors

We train our word type representations used for non-contextual baselines with fastText (Bojanowski et al., 2017). We use window size 5 and a minimum count of 5, with 300 dimensions.

## B Other Low-Resource Simulations

In addition to the 100-sentence condition, we simulated low-resource experiments with 500 and 1000 sentences of target language data, and zero-target-treebank experiments in which the parser was trained with only source language data, but with multilingual representations allowing crosslingual transfer. See Table 9 for these results. The additional low-resource results confirm our analysis in Section 4.2: polyglot training is more effective the less target-language data is available, with a slight advantage for related languages.

## C UD Treebanks

Additional statistics about the languages and treebanks used are given in Table 10.

## D Additional Experiments

**Semantic Role Labeling** For SRL, we again follow the hyperparameters given in AllenNLP (Table 11). The one exception is that we used 4 layers of alternating BiLSTMs instead of 8 layers to expedite the training process.

<sup>14</sup>[github.com/allenai/bilm-tf](https://github.com/allenai/bilm-tf)

| target | $ D_\tau  = 0$ |              | $ D_\tau  = 100$ |              |              | $ D_\tau  = 500$ |              |              | $ D_\tau  = 1000$ |              |              |
|--------|----------------|--------------|------------------|--------------|--------------|------------------|--------------|--------------|-------------------|--------------|--------------|
|        | +eng           | +rel.        | mono             | +eng         | +rel.        | mono             | +eng         | +rel.        | mono              | +eng         | +rel.        |
| ARA    | 10.31          | <b>20.47</b> | 62.50            | 73.39        | <b>73.43</b> | 76.15            | <b>79.55</b> | 79.16        | 79.43             | 81.38        | <b>81.49</b> |
| HEB    | 23.76          | <b>24.89</b> | 64.53            | 74.86        | <b>75.69</b> | 79.27            | 82.35        | <b>82.92</b> | 82.59             | 84.59        | <b>84.70</b> |
| HRV    | 48.69          | <b>67.67</b> | 63.49            | 79.21        | <b>82.00</b> | 80.80            | 84.92        | <b>85.89</b> | 84.14             | 86.27        | <b>86.66</b> |
| RUS    | 38.69          | <b>73.24</b> | 59.51            | 75.63        | <b>79.29</b> | 77.38            | 83.16        | <b>84.60</b> | 82.90             | 85.68        | <b>86.99</b> |
| NLD    | 61.68          | <b>72.90</b> | 57.12            | 74.90        | <b>77.01</b> | 75.19            | <b>82.42</b> | 81.33        | 81.41             | <b>84.93</b> | 83.23        |
| DEU    | 51.18          | <b>68.66</b> | 60.26            | 72.52        | <b>73.45</b> | 72.94            | <b>77.88</b> | 77.68        | 76.46             | <b>78.67</b> | 78.57        |
| SPA    | 55.85          | <b>75.88</b> | 64.97            | 80.86        | <b>81.55</b> | 79.67            | <b>84.88</b> | 84.63        | 82.97             | 86.69        | <b>86.81</b> |
| ITA    | 59.71          | <b>78.12</b> | 69.17            | <b>84.63</b> | 83.51        | 82.96            | <b>88.96</b> | 87.91        | 87.03             | <b>90.22</b> | 89.32        |
| CMN    | <b>8.16</b>    | 5.34         | 53.36            | <b>63.63</b> | 61.47        | 71.94            | 74.88        | <b>74.98</b> | 77.42             | <b>79.07</b> | 78.96        |
| JPN    | 4.12           | <b>11.66</b> | 72.37            | <b>80.94</b> | 80.24        | 86.20            | <b>87.74</b> | <b>87.74</b> | 88.74             | 89.08        | <b>89.32</b> |

Table 9: LAS for UD parsing with additional simulated low-resource and zero-target-treebank settings.

**Named Entity Recognition** We again use the hyperparameter configurations provided in AllenNLP. See Table 12 for details.

| Lang                                     | Code | WALS Genus | WALS 81A          | Size (# sents.) | Treebank  | Genre                                                                            |
|------------------------------------------|------|------------|-------------------|-----------------|-----------|----------------------------------------------------------------------------------|
| English                                  | eng  | Germanic   | SVO               |                 | EWT       | blog, email, reviews, social                                                     |
| Simulation Pairs                         |      |            |                   |                 |           |                                                                                  |
| Arabic                                   | ara  | Semitic    | VSO/SVO           | 5241            | PADT      | news                                                                             |
| Hebrew                                   | heb  | Semitic    | SVO               |                 | HTB       | news                                                                             |
| Croatian                                 | hrv  | Slavic     | SVO               | 6983            | SET       | news, web, wiki                                                                  |
| Russian                                  | rus  | Slavic     | SVO               |                 | SynTagRus | contemporary fiction, popular, science, newspaper, journal articles, online news |
| Dutch                                    | nld  | Germanic   | SOV/SVO           | 12269           | Alpino    | news                                                                             |
| German                                   | deu  | Germanic   | SOV/SVO           |                 | GSD       | news, reviews, wiki                                                              |
| Spanish                                  | spa  | Romance    | SVO               | 12543           | GSD       | blog, news, reviews, wiki                                                        |
| Italian                                  | ita  | Romance    | SVO               |                 | ISDT      | legal, news, wiki                                                                |
| Chinese                                  | cmn  | Chinese    | SVO               | 3997            | GSD       | wiki                                                                             |
| Japanese                                 | jpn  | Japanese   | SOV               |                 | GSD       | wiki                                                                             |
| Truly Low Resource and Related Languages |      |            |                   |                 |           |                                                                                  |
| <b>Hungarian</b>                         | hun  | Ugric      | SOV/SVO           | 910             | Szeged    | news                                                                             |
| Finnish                                  | fin  | Finnic     | SVO               | 12217           | TDT       | news, wiki, blog, legal, fiction, grammar-examples                               |
| <b>Vietnamese</b>                        | vie  | Viet-Muong | SVO               | 1400            | VTB       | news                                                                             |
| <b>Uyghur</b>                            | uig  | Turkic     | SOV               | 1656            | UDT       | fiction                                                                          |
| <b>Kazakh</b>                            | kaz  | Turkic     | SOV (not in WALS) | 31              | KTB       | wiki, fiction, news                                                              |
| Turkish                                  | tur  | Turkic     | SOV               | 3685            | IMST      | nonfiction, news                                                                 |

Table 10: List of the languages and their UD treebanks used in our experiments. Each shaded/unshaded section corresponds to a pair of *related* languages. WALS 81A denotes Feature 81A in WALS, Order of Subject, Object, and Verb (Dryer and Haspelmath, 2013). Size represents the downsampled size in # of sentences used for source treebanks.

|                                    |      |
|------------------------------------|------|
| Input                              |      |
| Predicate indicator embedding size | 100  |
| Word-level Alternating BiLSTM      |      |
| LSTM size                          | 300  |
| # LSTM layers                      | 4    |
| Recurrent dropout rate             | 0.1  |
| Use Highway Connection             | Yes  |
| Training                           |      |
| Batch size                         | 80   |
| # Epochs                           | 80   |
| Early stopping                     | 20   |
| Adadelata (Zeiler, 2012) lrate     | 0.1  |
| Adadelata $\rho$                   | 0.95 |
| Gradient clipping                  | 1.0  |

Table 11: SRL hyperparameters.

|                                  |       |
|----------------------------------|-------|
| Char-level LSTM                  |       |
| Char embedding size              | 25    |
| Input dropout rate               | 0.5   |
| LSTM size                        | 128   |
| # LSTM layers                    | 1     |
| Word-level BiLSTM                |       |
| LSTM size                        | 200   |
| # LSTM layers                    | 3     |
| Inter-layer dropout rate         | 0.5   |
| Recurrent dropout rate           | 0.5   |
| Use Highway Connection           | Yes   |
| Multilayer Perceptron            |       |
| MLP size                         | 400   |
| Activation                       | tanh  |
| Training                         |       |
| Batch size                       | 64    |
| # Epochs                         | 50    |
| Early stopping                   | 25    |
| Adam (Kingma and Ba, 2015) lrate | 0.001 |
| Adam $\beta_1$                   | 0.9   |
| Adam $\beta_2$                   | 0.999 |
| L2 regularization coefficient    | 0.001 |

Table 12: NER hyperparameters.
